# Supplementary material for: Pre-Hospital Emergency Medical Services Utilization Amid COVID-19 in 2020: Descriptive Study Based on Routinely Collected Dispatch Data in Bavaria, Germany
Source: MDPI journal article supplement (doi:10.3390/healthcare11141983), 2023-07-08

|                                                                                      |   |
|--------------------------------------------------------------------------------------|---|
| 1 Supplement Table S1: Timeline of key COVID-19 mitigation measures in Bavaria ..... | 2 |
| 2 Supplement Table S2: Description of dispatch keywords.....                         | 4 |
| 3 Supplement Figure S1: Emergency rates 2020 and average rates 2018/2019.....        | 5 |
| 4 Supplement Figure S2: Transport rates 2020 and average rates 2018/2019.....        | 6 |

**Supplement Table S1. Timeline of key COVID-19 mitigation measures in Bavaria**

| Dates                                                                                                          | Key aspects                                                                                                                                                                                                                                                                                                                                                                                                                                                                                          | Schools                                                                                                                                                                | Daycare / kindergarten                                                                                                                                                                                      |
|----------------------------------------------------------------------------------------------------------------|------------------------------------------------------------------------------------------------------------------------------------------------------------------------------------------------------------------------------------------------------------------------------------------------------------------------------------------------------------------------------------------------------------------------------------------------------------------------------------------------------|------------------------------------------------------------------------------------------------------------------------------------------------------------------------|-------------------------------------------------------------------------------------------------------------------------------------------------------------------------------------------------------------|
| <p>Frist lockdown<br/>20.03.2020 – 10.05.2020</p> <p>(state of emergency<br/>20.03.2020 – 15.06.2020)</p>      | <p>stay-at-home order: leaving one's home is permitted for essential purposes only</p> <p>citizens are requested to reduce contact with others, except members of their own household, to an absolute minimum.</p> <p>no more than one household or two people not living in the same household are allowed to meet in private or public</p> <p>non-essential businesses and restaurants are closed, non-essential activities are prohibited, delivery and pick up of takeaway food is permitted</p> | <p>schools are closed from 16.03 – 10.05.2020</p> <p>distance learning is established</p> <p>closures partially exclude graduating classes and emergency childcare</p> | <p>daycare centers and kindergartens are closed from 16.03 – 10.05,</p> <p>emergency childcare is offered for children of parents working in certain occupational groups (i.e. critical infrastructure)</p> |
| <p>Incidence-related restrictions<br/>11.5.2020 - 01.11.2020</p> <p>“traffic light system” from 17.10.2020</p> | <p>no movement restrictions</p> <p>stores are reopen, cultural events and leisure activities are allowed</p> <p>citizens are still requested to reduce contact with those outside of their own household to a minimum, yet contact restrictions are loosened and private events can be held</p> <p>mask mandates in certain locations</p> <p>incidence-related restrictions with the introduction of a “traffic light system”</p>                                                                    | <p>face-to-face teaching with suitable measures to ensure that a minimum distance of 1.5 m can be maintained during class</p>                                          | <p>daycare centers and kindergartens are open with hygiene concepts in place</p>                                                                                                                            |
| <p>Lockdown “light”<br/>02.11.2020 – 09.12.2020</p>                                                            | <p>up to 10 people from no more than two households can meet</p> <p>non-essential shops stay open</p> <p>culture and leisure services as well as restaurants are closed, delivery and pick up of takeaway food is permitted</p>                                                                                                                                                                                                                                                                      | <p>for each school, local authorities decide whether face-to-face teaching is feasible</p>                                                                             | <p>daycare centers and kindergartens stay open to everyone in need of childcare</p>                                                                                                                         |

|                                                                                                                        |                                                                                                                                                                                                                                                                                                                                                                                                                                                                                |                                                                                                                                       |                                                                                                |
|------------------------------------------------------------------------------------------------------------------------|--------------------------------------------------------------------------------------------------------------------------------------------------------------------------------------------------------------------------------------------------------------------------------------------------------------------------------------------------------------------------------------------------------------------------------------------------------------------------------|---------------------------------------------------------------------------------------------------------------------------------------|------------------------------------------------------------------------------------------------|
| <p>Second lockdown<br/>09.12.2020 –<br/>18.04.2021</p> <p>(state of<br/>emergency<br/>09.12.2020 –<br/>06.06.2021)</p> | <p>stay-at-home order: leaving one's home is permitted for essential purposes only</p> <p>curfews in 'hotspots' (7 day incidence of &gt;200 cases/100,000 population) from 21:00-05:00</p> <p>up to 10 people from no more than two households can meet</p> <p>non-essential businesses and restaurants are closed, non-essential activities are prohibited, delivery and pick up of takeaway food is permitted, goods can be pre-ordered and picked up from retail stores</p> | <p>schools are closed and distance learning is in place from 16.12, some children are eligible for emergency childcare in schools</p> | <p>daycare centers and kindergartens are closed from 16.12, emergency childcare is offered</p> |
|------------------------------------------------------------------------------------------------------------------------|--------------------------------------------------------------------------------------------------------------------------------------------------------------------------------------------------------------------------------------------------------------------------------------------------------------------------------------------------------------------------------------------------------------------------------------------------------------------------------|---------------------------------------------------------------------------------------------------------------------------------------|------------------------------------------------------------------------------------------------|

**Supplement Table S2. Description of dispatch keywords**

| Category         | Description                                                                                                                                                          |
|------------------|----------------------------------------------------------------------------------------------------------------------------------------------------------------------|
| Pain             | Pain (acute or increasing), severe pain, sudden onset of severe headache or colicky pain                                                                             |
| Respiratory      | Shortness of breath, dyspnea, (acute), increasing respiratory dysfunction (cyanosis, stridor, wheezing, bradypnea, tachypnea, respiratory arrest)                    |
| Consciousness    | Disturbance of consciousness, unconsciousness                                                                                                                        |
| Cardiovascular   | Cardiovascular complaints (acute), hyper- / hypotension, acute onset of chest pain, shock signs, bradycardia, arrhythmia, pacemaker malfunction, allergic reaction   |
| Pediatric        | Child sick or injured (classification as pediatric is not depending on age, but on the dispatcher's classification)                                                  |
| Neurologic       | Unspecified symptoms and signs involving cognitive function and awareness, neurological deficits including disturbance of consciousness, seizure                     |
| Mental health    | Psychiatric condition that does not allow referral to primary care, suicide risk, situation with third party at risk                                                 |
| Other emergency  | Metabolic disturbances, intoxication, gastrointestinal/gynecologic bleeding, nosebleed, abnormal body temperature, home emergency call, pregnancy-related conditions |
| Trauma           | Acute injury (with and without instable vital signs)                                                                                                                 |
| Traffic accident | Acute injuries with the need for prompt care after traffic accidents (with and without instable vital signs)                                                         |

**Supplement Figure S1. Emergency rates 2020 and average rates 2018/2019**

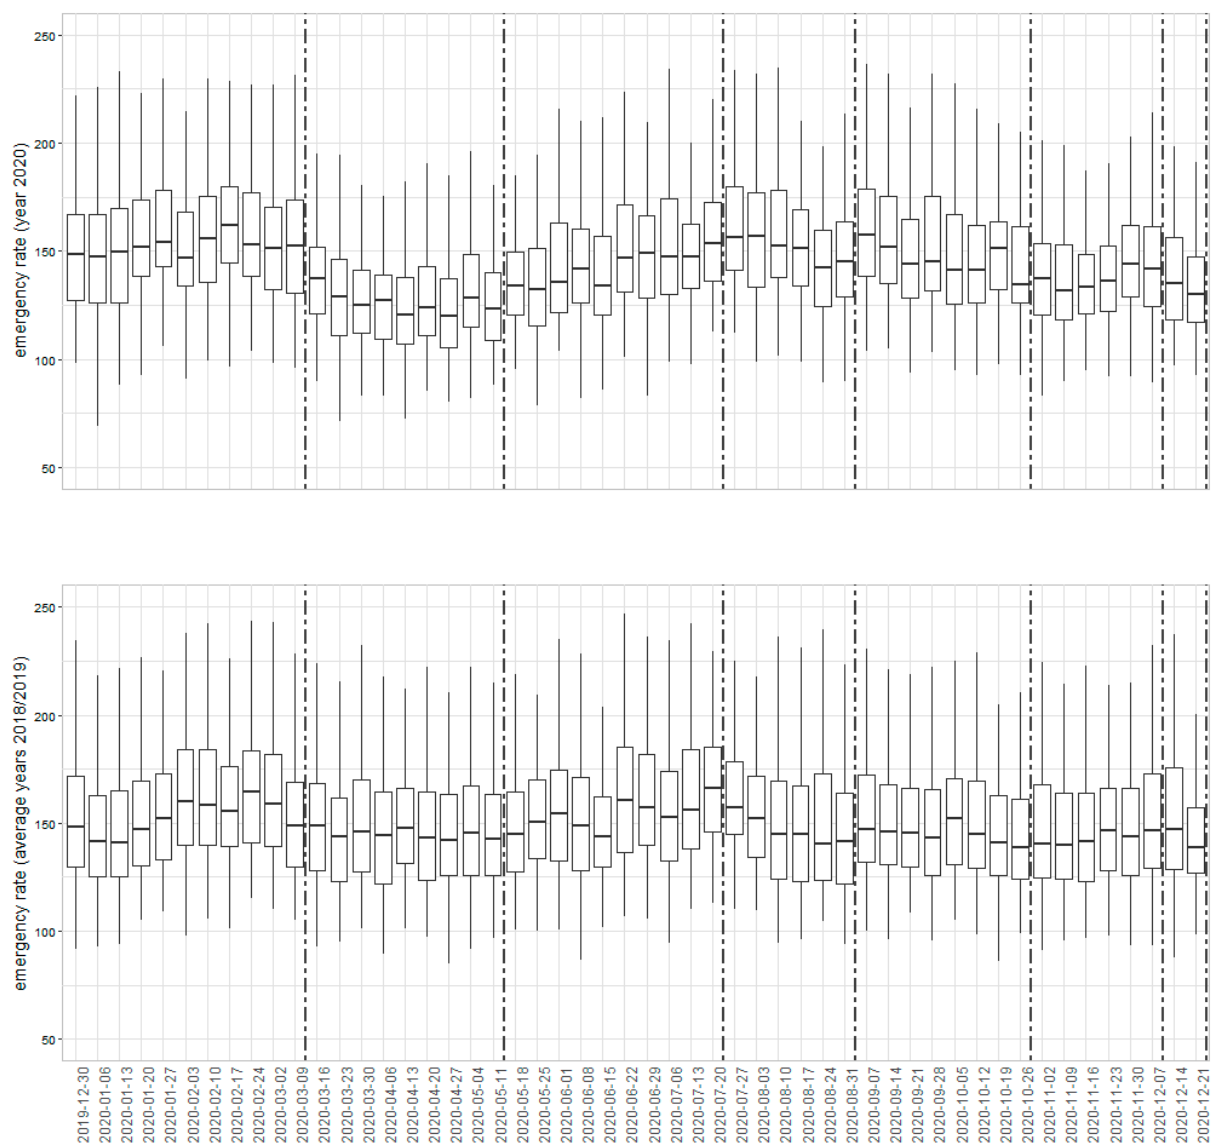

**Supplement Figure S2. Transport rates 2020 and average rates 2018/2019**

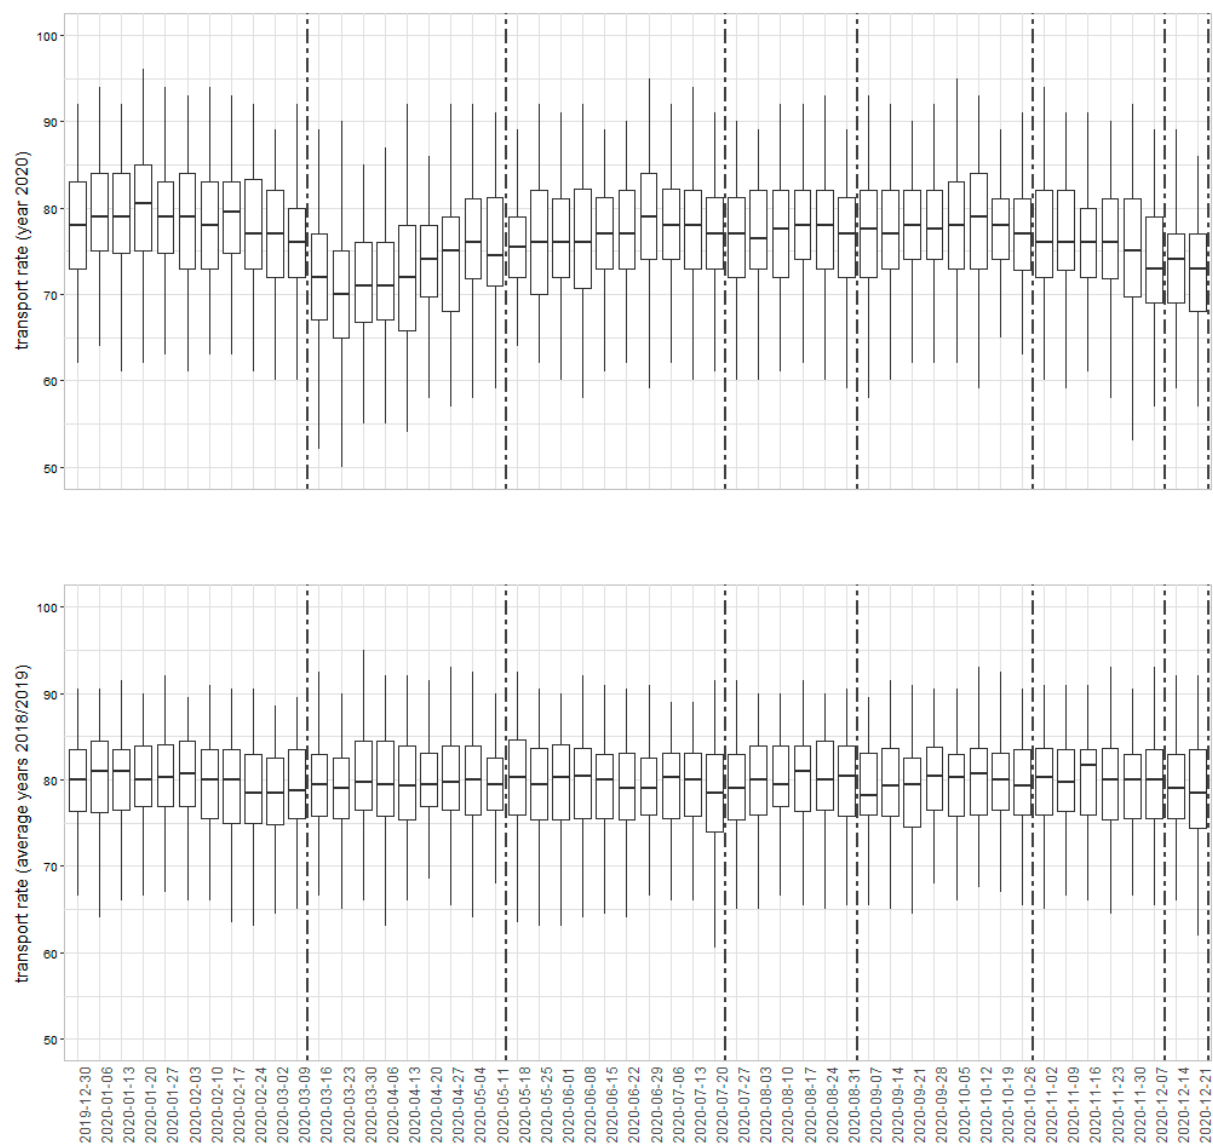

Supplement: s1 [file s1]
